# Supplementary material for: Biased action of the CXCR4-targeting drug plerixafor is essential for its superior hematopoietic stem cell mobilization
Source: PubMed Central journal article supplement (PMC8115334; doi:10.1038/s42003-021-02070-9), 2021-05-12
Supplement: 42003_2021_2070_MOESM2_ESM.pdf [file 42003_2021_2070_MOESM2_ESM.pdf]

## Description of Additional Supplementary Files

**File name:** Supplementary Data 1

**Description:** The table is a non-exhaustive list of clinical trials where plerixafor has been tested for different clinical indications. Plerixafor is used under several drug-names; AMD3100, LM2987, JM 3100, Plerixafor, Mozobil.

**File name:** Supplementary Data 2

**Description:** Source data for all graphs and chart.
